# Supplementary material for: Investigating the Relationship between Ambulatory and Hospital Patient Experience Scores in a Neurosurgery Practice
Source: MDPI journal article supplement (doi:10.3390/healthcare9091153), 2021-09-03
Supplement: s1 [file s1]

# Supplementary Materials

**Table S1.** Total neurosurgeon practice's ambulatory and hospital mean Press Ganey scores by year

| Table S1: Total neurosurgeon practice's ambulatory and hospital mean Press Ganey scores by year |     |                   |     |                   |     |                   |     |                   |     |                   |         |
|-------------------------------------------------------------------------------------------------|-----|-------------------|-----|-------------------|-----|-------------------|-----|-------------------|-----|-------------------|---------|
| PG Questions                                                                                    |     | Year              |     |                   |     |                   |     |                   |     |                   | p-Value |
|                                                                                                 | N   | 2016<br>Mean ± SD | N   | 2017<br>Mean ± SD | N   | 2018<br>Mean ± SD | N   | 2019<br>Mean ± SD | N   | 2020<br>Mean ± SD |         |
| AMBULATORY CLINIC                                                                               |     |                   |     |                   |     |                   |     |                   |     |                   |         |
| Care Provider Overall                                                                           | 178 | 95.35 ± 10.59     | 399 | 94.30 ± 13.63     | 506 | 91.25 ± 18.22     | 584 | 91.41 ± 18.88     | 582 | 93.68 ± 14.51     | 0.0740  |
| Likelihood to Recommend<br>Care Provider to Others                                              | 174 | 94.54 ± 12.57     | 392 | 94.20 ± 15.58     | 506 | 91.45 ± 19.77     | 574 | 91.42 ± 21.03     | 569 | 92.84 ± 17.87     | 0.3011  |
| Survey Overall                                                                                  | 179 | 92.13 ± 11.34     | 404 | 91.33 ± 11.38     | 512 | 89.60 ± 14.47     | 586 | 91.22 ± 13.34     | 586 | 92.62 ± 12.10     | 0.0003  |
| HOSPITAL                                                                                        |     |                   |     |                   |     |                   |     |                   |     |                   |         |
| Doctors Overall                                                                                 | 36  | 91.32 ± 11.88     | 100 | 89.71 ± 13.65     | 91  | 90.71 ± 16.77     | 55  | 90.76 ± 16.49     | 90  | 91.11 ± 14.98     | 0.6169  |
| Likelihood to Recommend<br>Hospital to Others                                                   | 36  | 97.92 ± 7.01      | 100 | 92.75 ± 17.15     | 91  | 95.89 ± 15.86     | 55  | 92.73 ± 18.43     | 90  | 91.68 ± 20.48     | 0.2571  |
| Survey Overall                                                                                  | 37  | 93.62 ± 7.94      | 100 | 90.50 ± 12.31     | 91  | 92.75 ± 11.41     | 57  | 92.04 ± 12.30     | 91  | 89.61 ± 11.72     | 0.2582  |

Supplementary Materials

**Table S2. Surgeon's ambulatory and hospital mean Press Ganey scores by year**

| Question by Surgeon                             | Year |                   |     |                   |     |                   |     |                   |     |                   | p-Value       |
|-------------------------------------------------|------|-------------------|-----|-------------------|-----|-------------------|-----|-------------------|-----|-------------------|---------------|
|                                                 | N    | 2016<br>Mean ± SD | N   | 2017<br>Mean ± SD | N   | 2018<br>Mean ± SD | N   | 2019<br>Mean ± SD | N   | 2020<br>Mean ± SD |               |
| AMBULATORY CLINIC                               |      |                   |     |                   |     |                   |     |                   |     |                   |               |
| Care Provider Overall                           |      |                   |     |                   |     |                   |     |                   |     |                   |               |
| Surgeon A                                       | 18   | 97.92 ± 6.06      | 46  | 93.43 ± 12.64     |     |                   |     |                   |     |                   | 0.1266        |
| Surgeon B                                       | 66   | 94.60 ± 12.87     | 166 | 95.12 ± 12.06     | 188 | 91.87 ± 14.52     | 193 | 92.57 ± 15.51     | 169 | 93.88 ± 12.40     | 0.1523        |
| Surgeon C                                       | 57   | 94.92 ± 9.34      | 65  | 95.29 ± 10.13     | 108 | 93.19 ± 19.44     | 142 | 90.37 ± 19.35     | 132 | 92.90 ± 15.67     | 0.3219        |
| Surgeon D                                       | 30   | 96.04 ± 9.91      | 71  | 91.93 ± 19.07     | 94  | 91.82 ± 17.35     | 120 | 91.72 ± 19.74     | 105 | 94.10 ± 15.88     | 0.4091        |
| Surgeon E                                       |      |                   | 5   | 86.25 ± 30.75     | 56  | 84.23 ± 25.18     | 80  | 87.30 ± 26.50     | 62  | 90.91 ± 18.54     | 0.4768        |
| Surgeon F                                       | 7    | 96.43 ± 9.45      | 46  | 95.34 ± 11.48     | 60  | 91.46 ± 19.15     | 49  | 95.82 ± 9.37      | 82  | 94.54 ± 13.51     | 0.6926        |
| Surgeon G                                       |      |                   |     |                   |     |                   |     |                   | 32  | 97.66 ± 6.35      |               |
| Likelihood to Recommend Care Provider to Others |      |                   |     |                   |     |                   |     |                   |     |                   |               |
| Surgeon A                                       | 17   | 97.06 ± 8.30      | 45  | 95.00 ± 11.43     |     |                   |     |                   |     |                   | 0.5528        |
| Surgeon B                                       | 65   | 93.46 ± 15.48     | 165 | 95.91 ± 13.61     | 187 | 92.25 ± 16.40     | 191 | 93.19 ± 18.48     | 163 | 93.87 ± 13.63     | 0.0719        |
| Surgeon C                                       | 56   | 95.09 ± 10.02     | 63  | 94.84 ± 12.83     | 109 | 94.50 ± 18.43     | 140 | 90.00 ± 22.60     | 129 | 92.25 ± 18.17     | 0.2212        |
| Surgeon D                                       | 29   | 93.97 ± 12.77     | 70  | 89.64 ± 22.32     | 93  | 91.40 ± 19.33     | 116 | 91.59 ± 20.31     | 102 | 92.40 ± 21.63     | 0.4875        |
| Surgeon E                                       |      |                   | 4   | 81.25 ± 37.50     | 57  | 82.02 ± 29.03     | 79  | 87.97 ± 26.51     | 63  | 91.27 ± 19.13     | 0.1442        |
| Surgeon F                                       | 7    | 96.43 ± 9.45      | 45  | 94.44 ± 12.93     | 60  | 92.50 ± 19.69     | 48  | 93.75 ± 16.71     | 81  | 92.59 ± 19.54     | 0.9754        |
| Surgeon G                                       |      |                   |     |                   |     |                   |     |                   | 31  | 95.16 ± 16.35     |               |
| Survey Overall                                  |      |                   |     |                   |     |                   |     |                   |     |                   |               |
| Surgeon A                                       | 18   | 95.01 ± 7.83      | 47  | 88.49 ± 13.50     |     |                   |     |                   |     |                   | <b>0.0438</b> |
| Surgeon B                                       | 67   | 91.47 ± 13.32     | 168 | 91.87 ± 10.25     | 191 | 88.18 ± 13.65     | 195 | 91.30 ± 12.94     | 169 | 92.05 ± 12.51     | <b>0.0130</b> |
| Surgeon C                                       | 57   | 92.72 ± 9.04      | 67  | 93.05 ± 9.95      | 109 | 92.34 ± 14.95     | 142 | 89.67 ± 14.29     | 132 | 92.04 ± 12.50     | 0.4367        |
| Surgeon D                                       | 30   | 91.16 ± 12.29     | 71  | 90.03 ± 13.81     | 94  | 92.20 ± 12.04     | 120 | 92.57 ± 12.25     | 106 | 94.44 ± 10.92     | <b>0.0384</b> |
| Surgeon E                                       |      |                   | 5   | 87.62 ± 20.32     | 58  | 84.59 ± 18.93     | 80  | 91.06 ± 15.70     | 63  | 92.04 ± 12.92     | 0.0651        |
| Surgeon F                                       | 7    | 90.39 ± 12.43     | 46  | 92.20 ± 9.31      | 60  | 89.91 ± 13.15     | 49  | 92.32 ± 10.08     | 84  | 91.53 ± 12.66     | 0.8092        |
| Surgeon G                                       |      |                   |     |                   |     |                   |     |                   | 32  | 96.06 ± 7.51      |               |
| HOSPITAL                                        |      |                   |     |                   |     |                   |     |                   |     |                   |               |
| Doctors Overall                                 |      |                   |     |                   |     |                   |     |                   |     |                   |               |
| Surgeon A                                       | 9    | 93.52 ± 10.02     | 13  | 92.95 ± 13.96     |     |                   |     |                   |     |                   | 0.9690        |
| Surgeon B                                       | 14   | 88.69 ± 10.13     | 28  | 88.39 ± 13.67     | 35  | 85.96 ± 20.26     | 20  | 94.58 ± 9.47      | 43  | 89.92 ± 16.12     | 0.3725        |
| Surgeon C                                       | 8    | 88.02 ± 17.74     | 26  | 90.54 ± 12.11     | 16  | 90.10 ± 19.54     | 13  | 83.33 ± 26.35     | 14  | 88.69 ± 18.66     | 0.9644        |
| Surgeon D                                       | 4    | 100.00            | 15  | 90.56 ± 10.38     | 15  | 92.22 ± 14.25     | 10  | 92.50 ± 14.41     | 14  | 95.24 ± 8.47      | 0.3730        |
| Surgeon E                                       |      |                   | 5   | 86.67 ± 19.18     | 17  | 98.04 ± 4.69      | 4   | 91.67 ± 11.79     | 7   | 86.90 ± 18.54     | 0.1866        |
| Surgeon F                                       | 1    | 100.00            | 13  | 87.82 ± 18.51     | 8   | 94.27 ± 9.17      | 8   | 90.62 ± 13.68     | 10  | 95.00 ± 8.96      | 0.8708        |
| Surgeon G                                       |      |                   |     |                   |     |                   |     |                   | 2   | 100.00            |               |
| Likelihood to Recommend Hospital to Others      |      |                   |     |                   |     |                   |     |                   |     |                   |               |
| Surgeon A                                       | 9    | 97.22 ± 8.33      | 13  | 94.23 ± 14.98     |     |                   |     |                   |     |                   | 0.7370        |
| Surgeon B                                       | 14   | 100.00            | 28  | 91.96 ± 16.74     | 35  | 95.03 ± 20.69     | 21  | 91.67 ± 22.82     | 44  | 89.80 ± 23.61     | 0.1188        |
| Surgeon C                                       | 8    | 93.75 ± 11.57     | 26  | 93.27 ± 16.67     | 16  | 92.19 ± 19.83     | 13  | 96.15 ± 9.39      | 14  | 89.29 ± 21.29     | 0.9191        |
| Surgeon D                                       | 5    | 100.00            | 15  | 95.00 ± 10.35     | 15  | 96.67 ± 8.80      | 9   | 91.67 ± 25.00     | 14  | 98.21 ± 6.68      | 0.7696        |
| Surgeon E                                       |      |                   | 5   | 95.00 ± 11.18     | 17  | 98.53 ± 6.06      | 4   | 87.50 ± 14.43     | 6   | 91.67 ± 12.91     | 0.1653        |
| Surgeon F                                       |      |                   | 13  | 88.46 ± 28.17     | 8   | 100.00            | 8   | 93.75 ± 11.57     | 10  | 92.50 ± 23.72     | 0.4607        |
| Surgeon G                                       |      |                   |     |                   |     |                   |     |                   | 2   | 100.00            |               |
| Survey Overall                                  |      |                   |     |                   |     |                   |     |                   |     |                   |               |
| Surgeon A                                       | 9    | 93.48 ± 9.19      | 13  | 92.57 ± 11.41     |     |                   |     |                   |     |                   | 0.8584        |
| Surgeon B                                       | 14   | 93.73 ± 6.42      | 28  | 90.58 ± 11.72     | 35  | 91.62 ± 13.92     | 21  | 93.70 ± 13.43     | 44  | 89.16 ± 12.80     | 0.3236        |
| Surgeon C                                       | 8    | 90.35 ± 10.91     | 26  | 90.85 ± 10.18     | 16  | 88.62 ± 14.56     | 14  | 87.03 ± 15.19     | 14  | 88.72 ± 12.99     | 0.9719        |
| Surgeon D                                       | 5    | 98.19 ± 2.48      | 15  | 89.68 ± 11.45     | 15  | 92.98 ± 8.07      | 10  | 94.97 ± 6.74      | 14  | 90.65 ± 7.76      | 0.1712        |
| Surgeon E                                       |      |                   | 5   | 91.11 ± 9.99      | 17  | 97.24 ± 3.38      | 4   | 89.58 ± 10.17     | 7   | 86.45 ± 16.12     | 0.1125        |
| Surgeon F                                       | 1    | 96.88             | 13  | 88.25 ± 19.94     | 8   | 96.04 ± 4.04      | 8   | 94.01 ± 9.17      | 10  | 93.58 ± 7.13      | 0.9619        |
| Surgeon G                                       |      |                   |     |                   |     |                   |     |                   | 2   | 89.58 ± 7.37      |               |
